# Supplementary material for: Ligilactobacillus salivarius CCFM 1266 modulates gut microbiota and GPR109a-mediated immune suppression to attenuate immune checkpoint blockade-induced colitis
Source: Royal Society of Chemistry journal article supplement (doi:10.1039/d3fo03867j), 2023-01-01
Supplement: d3fo03867j1.pdf [file d3fo03867j1.pdf]

### Supporting Information

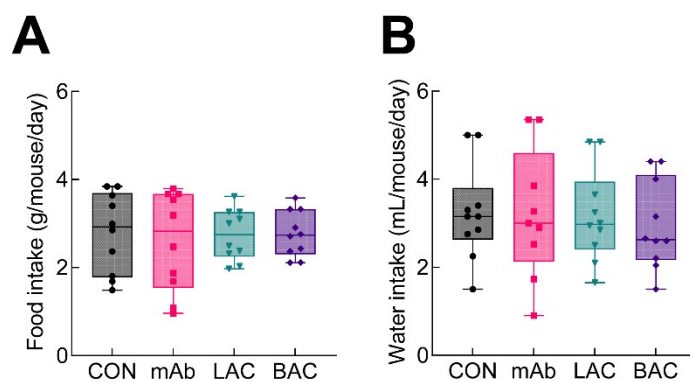

**Figure S1** *L. salivarius* CCFM 1266 treatment altered the food and water intake in ICB-associated colitis

(A) Food intake; (B) Water intake.
