# Supplementary material for: Ligilactobacillus salivarius CCFM 1266 modulates gut microbiota and GPR109a-mediated immune suppression to attenuate immune checkpoint blockade-induced colitis
Source: Royal Society of Chemistry journal article supplement (doi:10.1039/d3fo03867j), 2023-01-01
Supplement: d3fo03867j2.xlsx [file d3fo03867j2.xlsx]

## Sheet: Supplement table 1
Supplementary Table 1 Primer sequences
Primer
Gene	Forward	Reverse
IL-1β	TGCCACCTTTTGACAGTGATG	AAGGTCCACGGGAAAGACAC
IL-6	AAGCCAGAGTCCTTCAGAGAGATA	ATTTCAAGATGAATTGGATGGTCT
IL-10	CCCAGAAATCAAGGAGCATT	CTCTTCACCTGCTCCACTGC
TNF-α	AAATTCGAGTGACAAGCCTGTAG	GAGAACCTGGGAGTAGACAAGGT
Gpr109a	ATGGCGAGGCATATCTGTGTAGCA	TCCTGCCTGAGCAGAACAAGATGA
GAPDH	CCCTTAAGAGGGATGCTGCC	ACTGTGCCGTTGAATTTGCC

## Sheet: Supplement table 2
Supplementary Table 2 Sequencing depth for each sample
Sample name	Sequence count
CON1	32928
CON2	61261
CON3	25571
CON4	48041
CON5	21052
CON6	34694
mAb1	33395
mAb2	11657
mAb3	41658
mAb4	26048
mAb5	20806
mAb6	22093
LAC1	51342
LAC2	72428
LAC3	58504
LAC4	66132
LAC5	58481
LAC6	80633
BAC1	53592
BAC2	44752
BAC3	30942
BAC4	47634
BAC5	56225
BAC6	42971

## Sheet: Supplement table 3
Supplement table 3 Body weight change in probiotic treatment (compare with first day) for Figure1
DAY	CON
1	100	100	100	100	100	100	100	100	100	100
2	101.125	96.2677	103.09	101.845	100.256	102.013	104.829	102.52	102.442	103.386
3	103.195	100.601	105.261	103.15	101.109	100.789	102.105	102.52	101.401	101.362
4	103.555	101.544	101.378	100.63	98.1663	98.8556	99.7936	103.139	105.204	103.737
5	98.7399	101.587	101.253	103.15	100.597	100.395	103.425	100.165	101.601	103.62
6	92.6193	100.472	99.9165	102.97	99.1471	100.671	102.064	96.2825	103.963	104.476
7	81.5482	99.3565	93.737	99.55	95.565	100.947	98.2253	93.8455	96.1569	101.129
8	91.4658	98.3698	92.1921	98.6049	91.8124	93.4491	91.9109	88.5171	85.7886	89.4511
9	87.2049	89.6611	83.3403	96.8947	87.1215	89.2265	88.1964	83.5605	88.1507	82.0942
10	66.2916	86.1433	86.8894	97.8398	84.9041	87.4901	87.7837	79.5126	84.6068	85.3346
	mAb
1	100	100	100	100	100	100	100	100	100	100
2	101.125	96.2677	103.09	115.257	100.384	94.9487	101.129	106.573	103.277	102.798
3	103.195	100.601	105.261	113.636	102.857	94.0016	102.904	102.717	104.248	100.088
4	103.555	101.544	101.378	111.341	101.365	92.502	103.59	103.418	102.427	100.787
5	109.226	104.933	100.251	114.491	100.299	96.0537	100.686	102.761	104.409	100.568
6	107.471	104.719	98.5804	105.356	96.6738	90.0947	100.363	102.41	102.549	101.137
7	98.4248	89.7898	91.6075	99.73	92.1535	87.7269	89.8346	99.255	97.3301	94.5781
8	93.9244	83.7409	86.6388	88.1188	81.1514	80.7419	78.4187	89.7897	93.3252	88.6751
9	85.7336	75.3754	79.7912	80.6931	73.8166	76.5983	69.1811	80.7625	84.7087	83.6467
10	85.0135	68.8546	79.2484	76.0126	70.4904	76.0063	75.9376	74.8466	78.6408	81.6353
	LAC
1	100	100	100	100	100	100	100	100	100	100
2	103.059	102.933	95.4221	100.043	99.7335	101.651	105.102	102.458	106.519	104.485
3	104.696	109.532	92.4402	101.673	102.577	102.086	103.978	103.583	104.391	103.862
4	104.955	102.933	98.614	98.1553	100.933	99.9565	104.021	103.167	96.2879	104.028
5	104.653	104.491	97.7321	100.644	102.532	102.173	102.248	104.167	97.3291	103.447
6	103.059	101.787	97.2281	102.102	101.51	101.999	103.891	104.583	102.716	104.651
7	102.025	97.7544	91.9362	98.0695	95.7352	97.3055	99.438	101.333	102.535	100.332
8	100.388	97.3877	90.9702	95.7958	90.9374	92.6554	94.077	96.7917	95.3825	88.3721
9	97.975	94.7754	86.2243	92.3209	90.7597	91.4385	89.9697	92.2917	92.938	82.5581
10	94.7867	93.1714	91.3062	88.8889	86.5837	82.9639	85.4302	92.0833	87.9131	72.3422
	BAC
1	100	100	100	100	100	100	100	100	100	100
2	92.9038	98	109.099	104.085	100.858	98.9096	102.933	102.661	102.193	104.372
3	95.0245	102.122	108.304	104.216	100.316	99.1368	103.254	103.185	101.964	103.129
4	95.8809	100.694	107.774	104.476	98.6004	100.045	104.445	102.705	102.056	97.7711
5	95.0653	100	110.424	106.041	101.896	100.727	102.933	101.353	100	99.1427
6	96.0848	101.102	111.175	100.035	100.542	102.09	103.254	101.134	93.8328	100.857
7	94.5351	92.898	104.152	96.6102	99.3679	96.9105	102.383	102.269	101.325	95.3279
8	90.8646	87.6735	99.7792	89.0917	94.4921	91.6402	96.7003	95.7243	95.2033	89.2842
9	98.0832	81.9592	94.1696	87.2229	92.5056	87.0059	95.2796	89.0925	91.9598	84.4406
10	89.8042	77.5918	94.3021	80.9213	82.3025	84.6433	91.7965	82.1989	86.6149	82.4689

## Sheet: Supplement table 4
Supplement table 4 Length of colon (cm) for Figure1
CON	mAb	LAC	BAC
6.7	4.2	5.5	6.5
6.2	4.5	5.4	4.6
5.6	5.5	6.5	5.8
5.2	4.2	6	4.2
5.4	5	5	5.3
5.3	4.9	5.1	4.4
5.2	5	6.5	5.3
4.6	5.1	6.1	5.3
5.6		6.2	5.6
5.8			5.8

## Sheet: Supplement table 5
Supplement table 5 Relative weight of spleen (%) for Figure1
CON	mAb	LAC	BAC
0.328581	0.373213	0.363182	0.370572
0.286355	0.439252	0.65273	0.716991
0.313311	0.724974	0.656854	1.05761
0.332567	0.201895	0.391409	0.597207
0.520342	0.266788	0.482299	0.282501
0.633288	0.964694	0.726035	0.528717
0.802069	0.692037	0.508603	0.418372
0.520519	0.45679	0.470588	0.549894
0.710908		0.446962	0.376582
0.989583			0.637214

## Sheet: Supplement table 6
Supplement table 6 Elisa data of inflammatory cytokine for Figure 2
IL-6 concentration in colon (ng/g)					IL-1β concentration in colon (pg/g)
CON	mAb	LAC	BAC		CON	mAb	LAC	BAC
2.37161	3.18522	3.3064	2.26774		22.5084	169.832	19.2706	16.5335
1.66186	6.69416	1.59059	6.90709		5.08585	97.6413	10.8998	10.8873
3.56607	5.02019	2.9679	2.49278		3.39199	173.462	8.78245	20.8891
2.47547	2.76976	2.85631	3.73918		13.3535	90.7852	12.1097	19.0742
2.28505	3.53144	1.9869	2.90825		18.6367	67.7971	59.0941	15.4445
1.12522	3.7738	1.09059	2.23312		23.0327	32.3067	0.817275	21.2521
2.13691	3.53144	2.54472	6.88978		6.17476	56.908	15.1344	16.6141
1.3968	3.5101	2.618	2.76976		1.81912	147.65	37.7192	24.6801
IL-10 concentration in colon (pg/g)					IL-23 concentration in colon (pg/g)
CON	mAb	LAC	BAC		CON	mAb	LAC	BAC
43.0577	33.887	39.7537	33.887		2.41857	4.31888	4.31888	5.87367
26.9885	31.9853	65.0603	31.9853		4.14612	14.3387	7.08296	9.50153
38.9516	37.3956	47.1941	37.3956		1.72755	46.8166	7.60122	3.80061
35.9627	32.9224	38.9516	32.9224		2.76408	39.0426	8.11948	16.7572
30.8644	27.0344	40.4348	30.2416		7.25571	23.4947	5.52816	5.70092
38.7536	30.2416	37.4592	38.4259		8.29224	48.3714	4.14612	6.04643
31.8768	38.4259	35.4171	44.3192		1.38204	28.5046	3.28234	6.21918
35.2079	33.1274	43.4673	35.5967		4.49163	63.0556	3.10959	13.3021
TNF-α concentration in colon (pg/g)					IFN-γ concentration in colon (pg/g)
CON	mAb	LAC	BAC		CON	mAb	LAC	BAC
55.5538	84.8128	105.237	94.8344		2.42544	3.74842	5.07139	7.05584
28.0575	128.223	53.3092	113.633		14.1117	4.6304	3.30742	5.07139
76.0358	99.8847	41.8057	93.4315		12.5682	59.7542	4.4099	13.2297
63.41	112.23	86.1365	67.6186		4.6304	49.8319	4.4099	14.1117
38.1582	120.928	23.8489	65.374		3.52792	29.9873	3.52792	15.2142
46.2949	109.144	98.2013	130.59		6.17386	61.7386	23.593	6.39436
70.7049	110.266	103.252	81.6473		2.64594	36.3817	6.17386	6.39436
54.0307	109.355	73.1129	92.4468		2.20495	80.4807	4.1894	6.83535

## Sheet: Supplement table 7
Supplement table 7 qRT-PCR for IL-1β for Figure2
	GAPDH CT			Target CT			△CT
Sample	Rep1	Rep2	Rep3	Rep1	Rep2	Rep3	Rep1	Rep2	Rep3	Average △CT		△△CT	2^(-△△CT)		Fold change
CON1	12.3142	11.5306	11.383	32.3442	32.5606	32.8368	20.03	21.03	21.4539	20.838	20.7144	0.123533	0.917937	1.02425	0.896207
CON2	12.416	11.7866	12.2025	31.73	33.1326	33.8313	19.314	21.346	21.6289	20.763		0.0485333	0.966919		0.944029
CON3	12.9517	16.4687	10.9188	34.1287	35.8397	33.5996	21.177	19.371	22.6809	21.0763		0.361867	0.778157		0.759736
CON4	13.1478	9.97438	11.6362	33.1278	32.6064	31.3731	19.98	22.632	19.7369	20.783		0.0685333	0.953607		0.931032
CON5	12.6086	14.3997	11.0822	33.5556	33.3097	32.6591	20.947	18.91	21.5769	20.478		-0.236467	1.1781		1.15021
CON6	12.1663	14.5282	14.8201	34.6573	34.6202	33.8359	22.491	20.092	19.0159	20.533		-0.181467	1.13404		1.10719
CON7	14.9929	13.4907	10.2	33.7829	33.9877	32.1218	18.79	20.497	21.9219	20.403		-0.311467	1.24097		1.21159
mAb1	13.8894	16.2972	12.2705	33.8964	34.3812	32.9584	20.007	18.084	20.6879	19.593		-1.12147	2.17568		2.12418
mAb2	17.4933	15.1103	15.6881	36.8293	36.5243	37.1069	19.336	21.414	21.4189	20.723		0.00853333	0.994103		0.970569
mAb3	12.8452	11.5102	13.626	33.2202	33.1572	32.9629	20.375	21.647	19.3369	20.453		-0.261467	1.1987		1.17032
mAb4	13.5419	12.404	15.5295	33.2449	34.056	34.3033	19.703	21.652	18.7739	20.043		-0.671467	1.59269		1.55499
mAb5	14.1295	12.8057	13.5376	33.8805	33.5887	34.5125	19.751	20.783	20.9749	20.503		-0.211467	1.15786		1.13045
mAb6	10.9817	10.5017	13.5099	31.1107	32.0497	34.1217	20.129	21.548	20.6119	20.763		0.0485333	0.966919		0.944029
LAC1	11.1749	12.7747	9.06992	32.7399	32.5907	30.7578	21.565	19.816	21.6879	21.023		0.308533	0.807462		0.788347
LAC2	9.22053	12.5628	11.1007	32.0185	34.0118	30.8525	22.798	21.449	19.7519	21.333		0.618533	0.651333		0.635914
LAC3	10.384	13.8479	7.87669	32.006	33.3829	30.7186	21.622	19.535	22.8419	21.333		0.618533	0.651333		0.635914
LAC4	9.57274	13.5968	11.5143	31.7917	32.9518	33.0092	22.219	19.355	21.4949	21.023		0.308533	0.807462		0.788347
LAC5	11.8595	10.0311	9.26128	31.9865	31.8071	30.4271	20.127	21.776	21.1659	21.023		0.308533	0.807462		0.788347
LAC6	10.636	11.8763	13.688	32.902	32.3693	34.1579	22.266	20.493	20.4699	21.0763		0.361867	0.778157		0.759736
BAC1	12.4179	11.5713	11.5921	32.1749	32.5983	33.157	19.757	21.027	21.5649	20.783		0.0685333	0.953607		0.931032
BAC2	12.6623	10.4991	11.9407	33.1863	32.3501	31.7346	20.524	21.851	19.7939	20.723		0.00853333	0.994103		0.970569
BAC3	14.0084	11.794	12.872	32.6674	32.083	34.0528	18.659	20.289	21.1809	20.043		-0.671467	1.59269		1.55499
BAC4	10.463	13.2127	8.87828	31.129	31.0197	31.9141	20.666	17.807	23.0359	20.503		-0.211467	1.15786		1.13045
BAC5	11.3633	11.9786	9.53044	32.8723	31.7956	31.2733	21.509	19.817	21.7429	21.023		0.308533	0.807462		0.788347
BAC6	12.5654	12.6093	9.64687	32.2404	33.4633	32.1867	19.675	20.854	22.5399	21.023		0.308533	0.807462		0.788347

## Sheet: Supplement table 8
Supplement table 8 qRT-PCR for IL-6 for Figure2
	GAPDH CT			Target CT			△CT
Sample	Rep1	Rep2	Rep3	Rep1	Rep2	Rep3	Rep1	Rep2	Rep3	Average △CT		△△CT	2^(-△△CT)		Fold change
CON1	19.5744	20.7387	23.1024	33.4744	33.6387	36.2909	13.9	12.9	13.1885	13.3295	11.1584	-7.38492	167.141	200.125	0.835183
CON2	22.2022	20.5026	21.2951	34.6142	34.5346	34.7346	12.412	14.032	13.4395	13.2945		-7.41992	171.245		0.855692
CON3	19.9255	17.5673	20.0955	31.3605	31.9903	32.341	11.435	14.423	12.2455	12.7012		-8.01325	258.363		1.29101
CON4	16.9449	20.2145	18.9685	31.4239	31.9635	33.854	14.479	11.749	14.8855	13.7045		-7.00992	128.883		0.644014
CON5	22.302	20.126	21.0223	33.907	33.941	33.7058	11.605	13.815	12.6835	12.7012		-8.01325	258.363		1.29101
CON6	18.7851	20.8022	18.0155	31.9701	32.1852	32.311	13.185	11.383	14.2955	12.9545		-7.75992	216.755		1.0831
mAb1	19.9599	22.0438	18.4035	31.7739	31.3428	31.8474	11.814	9.299	13.4439	11.519		-9.19544	586.278		2.92956
mAb2	21.7659	18.9582	22.6736	31.9639	32.1552	32.2023	10.198	13.197	9.52878	10.9746		-9.73983	855.028		4.27247
mAb3	19.2323	21.4017	22.3953	31.7803	31.9267	31.6269	12.548	10.525	9.23161	10.7682		-9.94622	986.528		4.92956
mAb4	20.6979	21.9636	22.3344	32.1779	32.0756	32.4659	11.48	10.112	10.1315	10.5745		-10.1399	1128.29		5.63792
mAb5	21.9094	24.3097	26.4214	33.4744	33.6387	36.2909	11.565	9.329	9.8695	10.2545		-10.4599	1408.48		7.03799
mAb6	26.3822	24.4756	26.7321	34.6142	34.5346	34.7346	8.232	10.059	8.0025	8.7645		-11.9499	3956.26		19.7689
mAb7	21.0385	20.3133	22.0765	31.3605	31.9903	32.341	10.322	11.677	10.2645	10.7545		-9.95992	995.943		4.97661
LAC1	20.2119	21.7725	25.0935	31.4239	31.9635	33.854	11.212	10.191	8.7605	10.0545		-10.6599	1617.92		8.08453
LAC2	20.339	23.102	21.7393	33.907	33.941	33.7058	13.568	10.839	11.9665	12.1245		-8.58992	385.322		1.92541
LAC3	19.5341	21.9042	23.4553	31.9701	32.1852	32.311	12.436	10.281	8.8557	10.5242		-10.1902	1168.29		5.83782
LAC4	20.7429	21.9398	20.0179	31.7739	31.3428	31.8474	11.031	9.403	11.8295	10.7545		-9.95992	995.943		4.97661
LAC5	21.4009	24.1782	20.5788	31.9639	32.1552	32.2023	10.563	7.977	11.6235	10.0545		-10.6599	1617.92		8.08453
LAC6	17.4313	19.3697	18.6494	31.7803	31.9267	31.6269	14.349	12.557	12.9775	13.2945		-7.41992	171.245		0.855692
BAC1	20.6789	22.6116	24.5704	32.1779	32.0756	32.4659	11.499	9.464	7.8955	9.6195		-11.0949	2187.28		10.9296
BAC2	24.995	22.159	26.6963	33.907	33.941	33.7058	8.912	11.782	7.0095	9.2345		-11.4799	2856.28		14.2725
BAC3	23.1811	20.4722	23.9545	31.9701	32.1852	32.311	8.789	11.713	8.3565	9.6195		-11.0949	2187.28		10.9296
BAC4	20.3929	22.4518	20.3959	31.7739	31.3428	31.8474	11.381	8.891	11.4515	10.5745		-10.1399	1128.29		5.63792
BAC5	20.0079	21.4682	22.5818	31.9639	32.1552	32.2023	11.956	10.687	9.6205	10.7545		-9.95992	995.943		4.97661
BAC6	19.5544	22.0533	23.1192	31.2404	31.4633	32.1867	11.686	9.41	9.0675	10.0545		-10.6599	1617.92		8.08453

## Sheet: Supplement table 9
Supplement table 9 qRT-PCR for IL-10 for Figure2
	GAPDH CT			Target CT			△CT
Sample	Rep1	Rep2	Rep3	Rep1	Rep2	Rep3	Rep1	Rep2	Rep3	Average △CT		△△CT	2^(-△△CT)		Fold change
CON1	34.79	32.42	35.07	34.55	33.18	35.95	-0.24	0.76	0.88	0.466667	0.610592	-0.143925	1.10491	1.38069	0.800258
CON2	32.278	33.474	35.753	34.21	34.38	34.01	1.932	0.906	-1.743	0.364999		-0.245592	1.18558		0.858687
CON3	27.699	23.762	27.089	26.6	25.29	26.06	-1.099	1.528	-1.029	-0.2		-0.810591	1.75393		1.27033
CON4	25.968	28.409	23.693	26.51	26.32	26.07	0.542	-2.089	2.377	0.276667		-0.333925	1.26044		0.912905
CON5	26.167	29.368	23.375	26.46	26.72	25.58	0.293	-2.648	2.205	-0.0500002		-0.660592	1.58073		1.14489
CON6	34.544	37.607	33.119	35.6	35.72	34.53	1.056	-1.887	1.411	0.193334		-0.417258	1.33539		0.967189
CON7	32.877	34.848	36.435	34.37	34.51	34.2	1.493	-0.338	-2.235	-0.36		-0.970592	1.95964		1.41932
CON8	33.876	33.897	33.197	34.85	33.56	35.02	0.974	-0.337	1.823	0.819999		0.209407	0.864892		0.626421
mAb1	25.303	27.118	27.794	28.39	28.58	30.75	3.087	1.462	2.95601	2.50167		1.89108	0.269606		0.195269
mAb2	27.413	28.143	28.169	28.13	27.36	29.68	0.717	-0.783	1.511	0.481666		-0.128926	1.09348		0.791981
mAb3	28.883	25.26	27.567	29.73	27.28	30.78	0.847	2.02	3.21301	2.02667		1.41608	0.37473		0.271408
mAb4	31.965	35.046	31.289	35.01	35.82	34.55	3.045	0.774	3.261	2.36		1.74941	0.297424		0.215417
mAb5	35.287	36.299	32.864	36.1	35.08	33.71	0.813	-1.219	0.846002	0.146667		-0.463924	1.37929		0.998986
mAb6	31.226	33.829	32.835	35.43	35.04	35.22	4.204	1.211	2.38501	2.6		1.98941	0.251842		0.182403
mAb7	34.24	32.308	32.462	33.59	34.06	34.66	-0.65	1.752	2.198	1.1		0.489409	0.712317		0.515914
mAb8	32.48	30.856	30.864	34.29	34.38	33.45	1.81	3.524	2.58601	2.64		2.02941	0.244955		0.177415
LAC1	25.828	29.519	26.193	25.04	26.12	26.09	-0.788	-3.399	-0.103	-1.43		-2.04059	4.11414		2.97978
LAC2	24.885	35.242	24.423	24.32	36.6	26.14	-0.565	1.358	1.717	0.836666		0.226074	0.854958		0.619226
LAC3	25.521	26.313	24.636	26.85	25.53	26.25	1.329	-0.783	1.614	0.72		0.109408	0.926968		0.671381
LAC4	34.011	35.654	35.365	34.98	35.11	34.88	0.969	-0.544	-0.484998	-0.0199995		-0.630591	1.5482		1.12132
LAC5	35.42	32.057	31.813	34.92	34.25	33.42	-0.5	2.193	1.607	1.1		0.489409	0.712317		0.515914
LAC6	37.358	37.591	37.541	34.96	38.1	35.14	-2.398	0.509	-2.401	-1.43		-2.04059	4.11414		2.97978
LAC7	29.351	28.318	29.821	29.48	30.24	30.28	0.129	1.922	0.458997	0.836666		0.226074	0.854958		0.619226
LAC8	30.424	25.359	24.877	29.93	27.32	25.57	-0.494	1.961	0.693	0.72		0.109408	0.926968		0.671381
BAC1	26.348	27.607	28.6	28.38	27.12	28.15	2.032	-0.487	-0.450002	0.364999		-0.245592	1.18558		0.858687
BAC2	31.512	35.726	40.362	32.68	34.55	39.77	1.168	-1.176	-0.591999	-0.2		-0.810591	1.75393		1.27033
BAC3	32.696	39.243	30.016	32.06	39.86	31.48	-0.636	0.617	1.464	0.481666		-0.128926	1.09348		0.791981
BAC4	32.023	29.999	36.508	33.21	34.12	37.28	1.187	4.121	0.772006	2.02667		1.41608	0.37473		0.271408
BAC5	34.641	33.575	33.654	33.59	34.06	34.66	-1.051	0.485	1.006	0.146667		-0.463924	1.37929		0.998986
BAC6	35.113	37.621	33.676	34.29	34.38	33.45	-0.823	-3.241	-0.226	-1.43		-2.04059	4.11414		2.97978
BAC7	35.353	32.783	32.784	34.85	33.56	35.02	-0.503	0.777	2.236	0.836666		0.226074	0.854958		0.619226

## Sheet: Supplement table 10
Supplement table 10 qRT-PCR for TNF-α for Figure2
	GAPDH CT			Target CT			△CT
Sample	Rep1	Rep2	Rep3	Rep1	Rep2	Rep3	Rep1	Rep2	Rep3	Average △CT		△△CT	2^(-△△CT)		Fold change
CON1	21.7	22	20.6049	33.37	34.67	33.9	11.67	12.67	13.2951	12.545	12.0438	12.545	0.000167327	0.000116316	1.43856
CON2	18.789	19.909	21.6969	34.19	34.1	34.07	15.401	14.191	12.3731	13.9884		13.9884	6.1529e-05		0.528982
CON3	13.457	15.235	15.0929	26.31	26.1	28.33	12.853	10.865	13.2371	12.3184		12.3184	0.000195794		1.6833
CON4	15.164	11.432	12.0589	27.35	26.29	27.11	12.186	14.858	15.0511	14.0317		14.0317	5.97085e-05		0.51333
CON5	15.527	13.607	11.9509	27.62	28.56	26.12	12.093	14.953	14.1691	13.7384		13.7384	7.31708e-05		0.629069
CON6	21.909	25.036	20.6199	34.58	35.38	34.73	12.671	10.344	14.1101	12.375		12.375	0.000188253		1.61846
CON7	23.045	22.977	21.7329	36.1	37.19	35.97	13.055	14.213	14.2371	13.835		13.835	6.84287e-05		0.5883
mAb1	23.662	24.381	20.3919	35.5	34.91	33.44	11.838	10.529	13.0481	11.805		11.805	0.000279466		2.40265
mAb2	19.614	12.837	20.3839	30.02	25.8	30.31	10.406	12.963	9.92612	11.0984		11.0984	0.000456097		3.92119
mAb3	21.153	16.814	20.3179	31.15	29.1	29.45	9.997	12.286	9.13212	10.4717		10.4717	0.00070421		6.05429
mAb4	16.773	22.26	15.9919	27.21	29.82	29	10.437	7.56	13.0081	10.335		10.335	0.000774182		6.65585
mAb5	23.379	25.662	23.9139	33.25	38.04	37.25	9.871	12.378	13.3361	11.8617		11.8617	0.000268702		2.3101
mAb6	19.732	25.341	28.2819	32.95	37.08	37.42	13.218	11.739	9.13812	11.365		11.365	0.000379125		3.25944
LAC1	21.936	24.373	24.4859	35.43	35.19	35.56	13.494	10.817	11.0741	11.795		11.795	0.00028141		2.41936
LAC2	21.195	22.001	19.3189	34.03	32.99	33.72	12.835	10.989	14.4011	12.7417		12.7417	0.000146004		1.25523
LAC3	22.32	20.099	21.7159	33.68	32.86	33.79	11.36	12.761	12.0741	12.065		12.065	0.000233379		2.00642
LAC4	16.962	10.746	5.63688	27.29	23.02	18.86	10.328	12.274	13.2231	11.9417		11.9417	0.000254207		2.18549
LAC5	18.116	14.538	10.9209	28.45	26.83	23.68	10.334	12.292	12.7591	11.795		11.795	0.00028141		2.41936
LAC6	16.483	11.943	13.0489	29.09	27.26	23.35	12.607	15.317	10.3011	12.7417		12.7417	0.000146004		1.25523
BAC1	24.364	20.441	22.0599	35	32.82	34.46	10.636	12.379	12.4001	11.805		11.805	0.000279466		2.40265
BAC2	23.659	20.758	24.4079	34.42	33.65	34.05	10.761	12.892	9.64212	11.0984		11.0984	0.000456097		3.92119
BAC3	24.314	24.881	25.5399	35.36	33.88	36.91	11.046	8.999	11.3701	10.4717		10.4717	0.00070421		6.05429
BAC4	15.842	17.841	18.0419	27.69	27.94	27.1	11.848	10.099	9.05812	10.335		10.335	0.000774182		6.65585
BAC5	15.712	18.114	15.6889	29.24	29.12	26.54	13.528	11.006	10.8511	11.795		11.795	0.00028141		2.41936
BAC6	17.188	13.682	13.1649	28.22	27.34	26.7	11.032	13.658	13.5351	12.7417		12.7417	0.000146004		1.25523

[truncated: 15 more sheets: Supplement table 11, Supplement table 12, Supplement table 13, Supplement table 14, Supplement table 15, Supplement table 16, Supplement table 17, Supplement table 18, Supplement table 19, Supplement table 20, Supplement table 21, Supplement table 22, Supplement table 23, Supplement table 24, Supplement table 25]
